# Supplementary material for: The effect of Fe vacancies and Cu adhesion on the magnetic properties of Fe3GeTe2
Source: Royal Society of Chemistry journal article supplement (doi:10.1039/c9cp00151d), 2019-01-01
Supplement: c9cp00151d1.pdf [file c9cp00151d1.pdf]

## **The effect of Fe vacancies and Cu adhesion on the magnetic properties of Fe<sub>3</sub>GeTe<sub>2</sub>**

Jia Liu,<sup>a</sup> Anping Wang,<sup>a</sup> Kaisong Pu,<sup>a</sup> Shaozheng Zhang,<sup>a</sup> Jianhui Yang,<sup>\*ab</sup> Terence.Musho<sup>\*c</sup> and  
Liang Chen<sup>\*b</sup>

<sup>a</sup> Quzhou University, Quzhou 324000, P. R. China;

<sup>b</sup> Ningbo Institute of Materials Technology and Engineering, Chinese Academy of Sciences,  
Ningbo, Zhejiang, 315201, P. R. China.

<sup>c</sup> Department of Mechanical and Aerospace Engineering, West Virginia University, Morgantown,  
WV 26506-6106, USA.

Email: [jianhuiyoung@gmail.com](mailto:jianhuiyoung@gmail.com), [chenliang@nimte.ac.cn](mailto:chenliang@nimte.ac.cn), [tdmusho@mail.wvu.edu](mailto:tdmusho@mail.wvu.edu)

### **Support information**

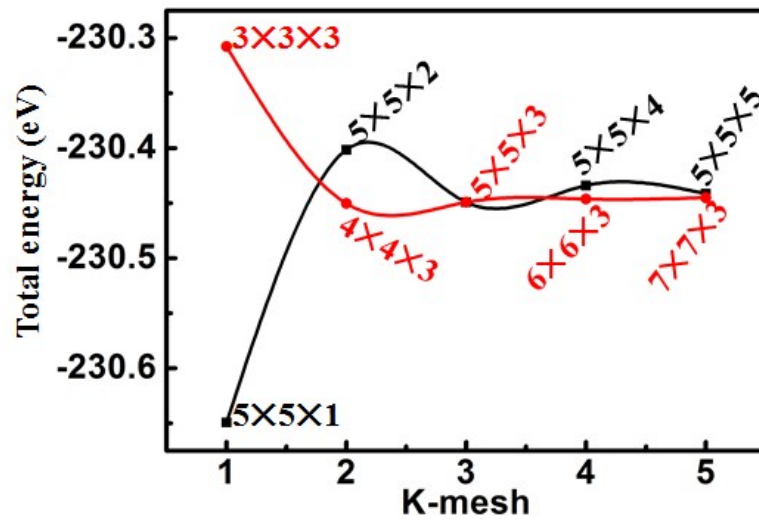

Fig. S1. Total energy of  $\text{Fe}_3\text{GeTe}_2$  with different K-meshes.

**Table S1. Coordinates and Bader charge distributions of perfect Fe<sub>3</sub>GeTe<sub>2</sub>**

| Atoms            | x      | y     | z      | Bader Charge |
|------------------|--------|-------|--------|--------------|
| Fe <sup>II</sup> | 1.155  | 2.000 | 12.340 | 8.091        |
| Fe <sup>II</sup> | 2.309  | 0.000 | 4.113  | 8.091        |
| Fe <sup>I</sup>  | 0.000  | 0.000 | 11.102 | 7.674        |
| Fe <sup>I</sup>  | 3.464  | 2.000 | 11.102 | 7.674        |
| Fe <sup>I</sup>  | 0.000  | 4.000 | 11.102 | 7.674        |
| Fe <sup>I</sup>  | 0.000  | 0.000 | 2.875  | 7.674        |
| Fe <sup>I</sup>  | 3.464  | 2.000 | 2.875  | 7.674        |
| Fe <sup>I</sup>  | 0.000  | 4.000 | 2.875  | 7.674        |
| Fe <sup>I</sup>  | 0.000  | 0.000 | 5.352  | 7.632        |
| Fe <sup>I</sup>  | 3.464  | 2.000 | 5.352  | 7.632        |
| Fe <sup>I</sup>  | 0.000  | 4.000 | 5.352  | 7.632        |
| Fe <sup>I</sup>  | 0.000  | 0.000 | 13.579 | 7.632        |
| Fe <sup>I</sup>  | 3.464  | 2.000 | 13.579 | 7.632        |
| Fe <sup>I</sup>  | 0.000  | 4.000 | 13.579 | 7.632        |
| Fe <sup>II</sup> | 4.619  | 0.000 | 12.340 | 8.091        |
| Fe <sup>II</sup> | -2.309 | 4.000 | 12.340 | 8.091        |
| Fe <sup>II</sup> | -1.155 | 2.000 | 4.113  | 8.091        |
| Fe <sup>II</sup> | 2.309  | 4.000 | 4.113  | 8.091        |
| Ge               | 2.309  | 0.000 | 12.340 | 4.014        |
| Ge               | -1.155 | 2.000 | 12.340 | 4.014        |
| Ge               | 2.309  | 4.000 | 12.340 | 4.014        |
| Ge               | 4.619  | 0.000 | 4.113  | 4.014        |
| Ge               | 1.155  | 2.000 | 4.113  | 4.014        |
| Ge               | -2.309 | 4.000 | 4.113  | 4.014        |
| Te               | 4.619  | 0.000 | 9.751  | 6.295        |
| Te               | 1.155  | 2.000 | 9.751  | 6.295        |
| Te               | -2.309 | 4.000 | 9.751  | 6.295        |
| Te               | 2.309  | 0.000 | 1.524  | 6.295        |
| Te               | -1.155 | 2.000 | 1.524  | 6.295        |
| Te               | 2.309  | 4.000 | 1.524  | 6.295        |
| Te               | 2.309  | 0.000 | 6.703  | 6.295        |
| Te               | -1.155 | 2.000 | 6.703  | 6.295        |
| Te               | 2.309  | 4.000 | 6.703  | 6.295        |
| Te               | 4.619  | 0.000 | 14.930 | 6.295        |
| Te               | 1.155  | 2.000 | 14.930 | 6.295        |
| Te               | -2.309 | 4.000 | 14.930 | 6.295        |

**Table S2. Coordinates and Bader charge distributions of Fe<sub>3</sub>GeTe<sub>2</sub> with 5.56% Fe<sup>II</sup> vacancy.**

| Atoms            | x      | y     | z      | Bader Charge |
|------------------|--------|-------|--------|--------------|
| Fe <sup>II</sup> | 2.288  | 0.001 | 4.097  | 8.093        |
| Fe <sup>I</sup>  | 3.413  | 5.911 | 11.090 | 7.762        |
| Fe <sup>I</sup>  | 3.473  | 1.982 | 11.090 | 7.757        |
| Fe <sup>I</sup>  | -0.020 | 3.998 | 11.090 | 7.757        |
| Fe <sup>I</sup>  | 3.430  | 5.941 | 2.851  | 7.687        |
| Fe <sup>I</sup>  | 3.438  | 1.982 | 2.851  | 7.676        |
| Fe <sup>I</sup>  | -0.003 | 3.968 | 2.851  | 7.676        |
| Fe <sup>I</sup>  | 3.430  | 5.941 | 5.343  | 7.649        |
| Fe <sup>I</sup>  | 3.438  | 1.982 | 5.343  | 7.638        |
| Fe <sup>I</sup>  | -0.003 | 3.968 | 5.343  | 7.638        |
| Fe <sup>I</sup>  | 3.413  | 5.911 | 13.492 | 7.712        |
| Fe <sup>I</sup>  | 3.473  | 1.982 | 13.492 | 7.706        |
| Fe <sup>I</sup>  | -0.020 | 3.998 | 13.492 | 7.706        |
| Fe <sup>II</sup> | 4.577  | 0.000 | 12.291 | 7.977        |
| Fe <sup>II</sup> | -2.288 | 3.964 | 12.291 | 7.977        |
| Fe <sup>II</sup> | -1.143 | 1.982 | 4.097  | 8.093        |
| Fe <sup>II</sup> | 2.288  | 3.963 | 4.097  | 8.093        |
| Ge               | 2.165  | 0.213 | 12.291 | 3.999        |
| Ge               | -0.898 | 1.982 | 12.291 | 3.999        |
| Ge               | 2.165  | 3.751 | 12.291 | 3.994        |
| Ge               | 4.577  | 0.000 | 4.097  | 4.002        |
| Ge               | 1.144  | 1.982 | 4.097  | 3.983        |
| Ge               | -2.288 | 3.964 | 4.097  | 4.002        |
| Te               | 4.577  | 0.000 | 9.718  | 6.276        |
| Te               | 1.144  | 1.982 | 9.783  | 6.312        |
| Te               | -2.288 | 3.964 | 9.718  | 6.276        |
| Te               | 2.279  | 0.016 | 1.490  | 6.283        |
| Te               | -1.126 | 1.982 | 1.490  | 6.283        |
| Te               | 2.279  | 3.948 | 1.490  | 6.283        |
| Te               | 2.279  | 0.016 | 6.704  | 6.283        |
| Te               | -1.126 | 1.982 | 6.704  | 6.283        |
| Te               | 2.279  | 3.948 | 6.704  | 6.283        |
| Te               | 4.577  | 0.000 | 14.865 | 6.276        |
| Te               | 1.144  | 1.982 | 14.799 | 6.312        |
| Te               | -2.288 | 3.964 | 14.865 | 6.276        |

**Table S3. Coordinates and Bader charge distributions of Fe<sub>3</sub>GeTe<sub>2</sub> with 11.11% Fe<sup>II</sup> vacancy.**

| Agtoms           | x      | y      | z      | Bader Charge |
|------------------|--------|--------|--------|--------------|
| Fe <sup>I</sup>  | 3.354  | 5.828  | 11.092 | 7.788        |
| Fe <sup>I</sup>  | 3.418  | 1.955  | 11.092 | 7.784        |
| Fe <sup>I</sup>  | -0.020 | 3.938  | 11.091 | 7.778        |
| Fe <sup>I</sup>  | 3.338  | 5.855  | 2.892  | 7.787        |
| Fe <sup>I</sup>  | 3.403  | 1.983  | 2.892  | 7.786        |
| Fe <sup>I</sup>  | 0.014  | 3.878  | 2.890  | 7.778        |
| Fe <sup>I</sup>  | 3.338  | 5.855  | 5.309  | 7.740        |
| Fe <sup>I</sup>  | 3.403  | 1.983  | 5.309  | 7.740        |
| Fe <sup>I</sup>  | 0.014  | 3.878  | 5.310  | 7.732        |
| Fe <sup>I</sup>  | 3.354  | 5.828  | 13.509 | 7.742        |
| Fe <sup>I</sup>  | 3.418  | 1.955  | 13.509 | 7.738        |
| Fe <sup>I</sup>  | -0.020 | 3.938  | 13.511 | 7.732        |
| Fe <sup>II</sup> | 1.122  | 5.859  | 12.301 | 7.986        |
| Fe <sup>II</sup> | -2.255 | 3.909  | 12.301 | 7.985        |
| Fe <sup>II</sup> | -1.128 | 1.957  | 4.100  | 7.983        |
| Fe <sup>II</sup> | 2.249  | 3.907  | 4.100  | 7.986        |
| Ge               | 2.131  | 0.212  | 12.301 | 3.981        |
| Ge               | -0.884 | 1.952  | 12.301 | 3.988        |
| Ge               | 2.132  | 3.693  | 12.301 | 3.981        |
| Ge               | 4.264  | -0.001 | 4.100  | 3.987        |
| Ge               | 1.249  | 1.740  | 4.100  | 3.978        |
| Ge               | -2.138 | 4.123  | 4.100  | 3.984        |
| Te               | 4.497  | 0.010  | 9.717  | 6.246        |
| Te               | 1.132  | 1.941  | 9.774  | 6.266        |
| Te               | -2.263 | 3.926  | 9.717  | 6.247        |
| Te               | 2.248  | 0.010  | 1.574  | 6.265        |
| Te               | -1.117 | 1.942  | 1.516  | 6.249        |
| Te               | 2.257  | 3.890  | 1.516  | 6.246        |
| Te               | 2.248  | 0.010  | 6.627  | 6.265        |
| Te               | -1.117 | 1.942  | 6.684  | 6.249        |
| Te               | 2.257  | 3.890  | 6.684  | 6.246        |
| Te               | 4.497  | 0.010  | 14.884 | 6.246        |
| Te               | 1.132  | 1.941  | 14.827 | 6.266        |
| Te               | -2.263 | 3.926  | 14.884 | 6.247        |

**Table S4. Coordinates and Bader charge distributions of perfect Fe<sub>3</sub>GeTe<sub>2</sub>/Cu interlayer.**

| Atoms            | x      | y     | z      | Bader Charge |
|------------------|--------|-------|--------|--------------|
| Fe <sup>I</sup>  | 3.376  | 5.836 | 15.359 | 7.713        |
| Fe <sup>I</sup>  | 3.379  | 1.938 | 15.351 | 7.688        |
| Fe <sup>I</sup>  | 0.006  | 3.887 | 15.351 | 7.688        |
| Fe <sup>I</sup>  | 3.364  | 5.837 | 6.856  | 7.800        |
| Fe <sup>I</sup>  | 3.371  | 1.923 | 6.842  | 7.785        |
| Fe <sup>I</sup>  | 0.001  | 3.889 | 6.843  | 7.784        |
| Fe <sup>I</sup>  | 3.373  | 5.832 | 9.431  | 7.645        |
| Fe <sup>I</sup>  | 3.372  | 1.934 | 9.424  | 7.646        |
| Fe <sup>I</sup>  | 0.003  | 3.883 | 9.424  | 7.650        |
| Fe <sup>I</sup>  | 3.377  | 5.818 | 17.925 | 7.756        |
| Fe <sup>I</sup>  | 3.384  | 1.940 | 17.923 | 7.742        |
| Fe <sup>I</sup>  | -0.006 | 3.887 | 17.922 | 7.744        |
| Fe <sup>II</sup> | 1.123  | 5.833 | 16.447 | 8.209        |
| Fe <sup>II</sup> | 4.506  | 3.880 | 16.438 | 8.235        |
| Fe <sup>II</sup> | 5.621  | 1.938 | 8.333  | 8.187        |
| Fe <sup>II</sup> | 2.249  | 3.885 | 8.333  | 8.186        |
| Fe <sup>II</sup> | 1.131  | 1.944 | 16.457 | 8.233        |
| Fe <sup>II</sup> | -1.129 | 5.827 | 8.336  | 8.182        |
| Ge               | -1.127 | 5.831 | 16.754 | 3.969        |
| Ge               | 5.627  | 1.933 | 16.763 | 3.968        |
| Ge               | 2.260  | 3.892 | 16.756 | 3.965        |
| Ge               | 1.120  | 5.832 | 8.025  | 3.974        |
| Ge               | 1.125  | 1.937 | 8.022  | 3.973        |
| Ge               | 4.494  | 3.880 | 8.018  | 3.970        |
| Te               | 1.145  | 5.830 | 13.925 | 6.185        |
| Te               | 1.125  | 1.925 | 13.931 | 6.180        |
| Te               | -2.256 | 3.907 | 13.920 | 6.183        |
| Te               | -1.145 | 5.829 | 5.436  | 6.206        |
| Te               | 5.619  | 1.921 | 5.435  | 6.204        |
| Te               | 2.253  | 3.902 | 5.450  | 6.201        |
| Te               | -1.115 | 5.830 | 10.862 | 6.229        |
| Te               | 5.619  | 1.942 | 10.859 | 6.223        |
| Te               | 2.254  | 3.878 | 10.863 | 6.229        |
| Te               | 1.126  | 5.821 | 19.361 | 6.256        |
| Te               | 1.123  | 1.922 | 19.253 | 6.115        |
| Te               | 4.494  | 3.881 | 19.392 | 6.228        |
| Cu               | 0.615  | 4.448 | 21.698 | 10.989       |
| Cu               | 3.495  | 1.112 | 21.697 | 10.973       |
| Cu               | 3.014  | 3.619 | 21.711 | 10.993       |

|    |        |       |        |        |
|----|--------|-------|--------|--------|
| Cu | 5.910  | 0.284 | 21.701 | 10.978 |
| Cu | -1.316 | 2.774 | 21.713 | 10.995 |
| Cu | -1.791 | 5.290 | 21.711 | 10.989 |
| Cu | 2.065  | 0.821 | 23.775 | 10.996 |
| Cu | 1.586  | 3.354 | 23.775 | 10.979 |
| Cu | 4.462  | 0.000 | 23.767 | 10.980 |
| Cu | 3.977  | 2.498 | 23.753 | 10.990 |
| Cu | 3.501  | 5.021 | 23.751 | 10.982 |
| Cu | -0.370 | 1.670 | 23.777 | 10.989 |
| Cu | -0.824 | 4.169 | 23.752 | 10.986 |
| Cu | 1.089  | 1.948 | 21.793 | 11.122 |
| Cu | 0.634  | 4.445 | 3.028  | 10.980 |
| Cu | 3.489  | 1.104 | 3.030  | 10.979 |
| Cu | 3.035  | 3.619 | 2.973  | 11.032 |
| Cu | 5.911  | 0.297 | 3.027  | 10.986 |
| Cu | -1.317 | 2.791 | 2.972  | 11.033 |
| Cu | -1.797 | 5.274 | 2.969  | 11.027 |
| Cu | -0.340 | 5.556 | 0.950  | 10.982 |
| Cu | 2.546  | 2.218 | 0.947  | 10.982 |
| Cu | 2.062  | 4.745 | 0.950  | 10.986 |
| Cu | 4.935  | 1.386 | 0.951  | 10.988 |
| Cu | 4.466  | 3.894 | 0.924  | 10.990 |
| Cu | 0.605  | 0.555 | 0.946  | 10.982 |
| Cu | 1.094  | 1.948 | 2.962  | 10.996 |
| Cu | 0.136  | 3.073 | 0.945  | 10.983 |

---

---

**Table S5. Coordinates and Bader charge distributions of Fe<sub>3</sub>GeTe<sub>2</sub>/Cu interlayer with 5.56% Fe<sup>II</sup> vacancy.**

| Atoms            | x      | y     | z      | Bader Charge |
|------------------|--------|-------|--------|--------------|
| Fe <sup>I</sup>  | 3.341  | 5.784 | 15.351 | 7.840        |
| Fe <sup>I</sup>  | 3.422  | 1.923 | 15.336 | 7.836        |
| Fe <sup>I</sup>  | -0.020 | 3.917 | 15.342 | 7.833        |
| Fe <sup>I</sup>  | 3.358  | 5.827 | 6.835  | 7.797        |
| Fe <sup>I</sup>  | 3.364  | 1.918 | 6.823  | 7.789        |
| Fe <sup>I</sup>  | 0.001  | 3.882 | 6.821  | 7.782        |
| Fe <sup>I</sup>  | 3.364  | 5.825 | 9.420  | 7.651        |
| Fe <sup>I</sup>  | 3.369  | 1.926 | 9.417  | 7.642        |
| Fe <sup>I</sup>  | -0.001 | 3.878 | 9.415  | 7.643        |
| Fe <sup>I</sup>  | 3.333  | 5.755 | 17.784 | 7.758        |
| Fe <sup>I</sup>  | 3.426  | 1.935 | 17.774 | 7.751        |
| Fe <sup>I</sup>  | -0.046 | 3.929 | 17.779 | 7.742        |
| Fe <sup>II</sup> | 1.122  | 5.813 | 16.505 | 8.028        |
| Fe <sup>II</sup> | 4.485  | 3.875 | 16.507 | 8.022        |
| Fe <sup>II</sup> | 5.608  | 1.938 | 8.336  | 8.153        |
| Fe <sup>II</sup> | 2.246  | 3.876 | 8.312  | 8.193        |
| Fe <sup>II</sup> | -1.125 | 5.819 | 8.338  | 8.146        |
| Ge               | 2.120  | 0.198 | 16.571 | 3.988        |
| Ge               | -0.885 | 1.932 | 16.572 | 3.987        |
| Ge               | 2.122  | 3.658 | 16.556 | 3.962        |
| Ge               | 1.120  | 5.820 | 7.999  | 3.971        |
| Ge               | 1.121  | 1.934 | 7.985  | 3.966        |
| Ge               | 4.486  | 3.877 | 7.987  | 3.963        |
| Te               | 1.140  | 5.814 | 13.907 | 6.203        |
| Te               | 1.121  | 1.923 | 14.056 | 6.230        |
| Te               | 4.484  | 3.886 | 13.920 | 6.192        |
| Te               | -1.138 | 5.814 | 5.414  | 6.192        |
| Te               | 5.607  | 1.915 | 5.414  | 6.193        |
| Te               | 2.247  | 3.891 | 5.425  | 6.192        |
| Te               | -1.137 | 5.820 | 10.871 | 6.277        |
| Te               | -1.106 | 1.932 | 10.871 | 6.275        |
| Te               | 2.250  | 3.870 | 10.836 | 6.245        |
| Te               | 1.114  | 5.817 | 19.239 | 6.267        |
| Te               | 1.121  | 1.934 | 19.076 | 6.242        |
| Te               | 4.466  | 3.867 | 19.266 | 6.268        |
| Cu               | 0.622  | 4.435 | 21.579 | 10.987       |
| Cu               | 3.496  | 1.112 | 21.580 | 10.978       |
| Cu               | 3.014  | 3.609 | 21.590 | 10.996       |
| Cu               | 5.910  | 0.283 | 21.579 | 10.979       |
| Cu               | -1.301 | 2.768 | 21.589 | 10.994       |
| Cu               | -1.777 | 5.280 | 21.589 | 10.989       |



|    |        |       |        |        |
|----|--------|-------|--------|--------|
| Cu | 2.060  | 0.826 | 23.646 | 10.987 |
| Cu | 1.585  | 3.336 | 23.646 | 10.983 |
| Cu | 4.459  | 0.000 | 23.644 | 10.980 |
| Cu | 3.976  | 2.493 | 23.631 | 10.994 |
| Cu | 3.498  | 5.007 | 23.630 | 10.983 |
| Cu | -0.355 | 1.668 | 23.647 | 10.985 |
| Cu | -0.818 | 4.161 | 23.632 | 10.988 |
| Cu | 1.097  | 1.943 | 21.621 | 11.026 |
| Cu | 0.627  | 4.435 | 3.024  | 10.977 |
| Cu | 3.475  | 1.100 | 3.026  | 10.974 |
| Cu | 3.024  | 3.608 | 2.957  | 11.032 |
| Cu | 5.891  | 0.295 | 3.020  | 10.987 |
| Cu | -1.319 | 2.784 | 2.960  | 11.029 |
| Cu | -1.800 | 5.260 | 2.957  | 11.027 |
| Cu | -0.340 | 5.545 | 0.936  | 10.985 |
| Cu | 2.540  | 2.209 | 0.937  | 10.983 |
| Cu | 2.057  | 4.732 | 0.936  | 10.987 |
| Cu | 4.925  | 1.383 | 0.937  | 10.985 |
| Cu | 4.457  | 3.885 | 0.912  | 10.989 |
| Cu | 0.601  | 0.556 | 0.935  | 10.985 |
| Cu | 1.086  | 1.943 | 2.959  | 11.001 |
| Cu | 0.138  | 3.067 | 0.936  | 10.990 |

---

---

**Table S6. Coordinates and Bader charge distributions of Fe<sub>3</sub>GeTe<sub>2</sub>/Cu interlayer with 11.11% Fe<sup>II</sup> vacancy.**

| Atoms            | x      | y     | z      | Bader Charge |
|------------------|--------|-------|--------|--------------|
| Fe <sup>I</sup>  | 3.332  | 5.769 | 15.218 | 7.791        |
| Fe <sup>I</sup>  | 3.379  | 1.923 | 15.215 | 7.775        |
| Fe <sup>I</sup>  | -0.016 | 3.887 | 15.215 | 7.775        |
| Fe <sup>I</sup>  | 3.359  | 5.739 | 6.861  | 7.812        |
| Fe <sup>I</sup>  | 3.285  | 1.913 | 6.863  | 7.819        |
| Fe <sup>I</sup>  | 0.037  | 3.910 | 6.858  | 7.815        |
| Fe <sup>I</sup>  | 3.369  | 5.733 | 9.327  | 7.800        |
| Fe <sup>I</sup>  | 3.291  | 1.910 | 9.327  | 7.793        |
| Fe <sup>I</sup>  | 0.033  | 3.892 | 9.325  | 7.800        |
| Fe <sup>I</sup>  | 3.304  | 5.711 | 17.675 | 7.824        |
| Fe <sup>I</sup>  | 3.416  | 1.925 | 17.674 | 7.830        |
| Fe <sup>I</sup>  | -0.049 | 3.920 | 17.673 | 7.826        |
| Fe <sup>II</sup> | 1.113  | 5.782 | 16.387 | 8.029        |
| Fe <sup>II</sup> | 4.455  | 3.851 | 16.384 | 8.026        |
| Fe <sup>II</sup> | 2.240  | 3.848 | 8.152  | 8.018        |
| Fe <sup>II</sup> | -1.122 | 5.775 | 8.156  | 8.038        |
| Ge               | 2.103  | 0.205 | 16.465 | 3.980        |
| Ge               | -0.870 | 1.919 | 16.466 | 3.974        |
| Ge               | 2.101  | 3.635 | 16.453 | 3.967        |
| Ge               | 4.583  | 0.207 | 8.090  | 3.970        |
| Ge               | 0.857  | 1.920 | 8.082  | 3.985        |
| Ge               | 4.597  | 3.617 | 8.087  | 3.977        |
| Te               | 4.474  | 0.004 | 13.800 | 6.220        |
| Te               | 1.113  | 1.931 | 13.876 | 6.216        |
| Te               | -2.232 | 3.867 | 13.799 | 6.221        |
| Te               | -1.112 | 5.786 | 5.430  | 6.229        |
| Te               | 5.565  | 1.922 | 5.489  | 6.231        |
| Te               | 2.225  | 3.855 | 5.430  | 6.230        |
| Te               | -1.115 | 5.777 | 10.759 | 6.170        |
| Te               | -1.106 | 1.917 | 10.634 | 6.215        |
| Te               | 2.234  | 3.842 | 10.755 | 6.179        |
| Te               | 1.112  | 5.787 | 19.135 | 6.227        |
| Te               | 1.111  | 1.925 | 18.960 | 6.136        |
| Te               | 4.448  | 3.853 | 19.150 | 6.231        |
| Cu               | 0.614  | 4.406 | 21.468 | 10.989       |
| Cu               | 3.469  | 1.103 | 21.469 | 10.981       |
| Cu               | 2.992  | 3.584 | 21.478 | 11.002       |
| Cu               | 5.867  | 0.280 | 21.472 | 10.981       |
| Cu               | -1.298 | 2.751 | 21.477 | 10.997       |
| Cu               | -1.773 | 5.244 | 21.476 | 10.992       |
| Cu               | 2.042  | 0.819 | 23.537 | 10.988       |

|    |        |       |        |        |
|----|--------|-------|--------|--------|
| Cu | 1.569  | 3.313 | 23.540 | 10.978 |
| Cu | 1.083  | 5.791 | 23.543 | 10.981 |
| Cu | 3.948  | 2.475 | 23.526 | 10.992 |
| Cu | 3.473  | 4.973 | 23.527 | 10.984 |
| Cu | -0.355 | 1.656 | 23.541 | 10.992 |
| Cu | -0.816 | 4.132 | 23.526 | 10.988 |
| Cu | 1.085  | 1.930 | 21.505 | 11.108 |
| Cu | 0.621  | 4.404 | 3.037  | 10.980 |
| Cu | 3.460  | 1.090 | 3.041  | 10.977 |
| Cu | 3.009  | 3.577 | 2.975  | 11.038 |
| Cu | 5.858  | 0.288 | 3.055  | 10.979 |
| Cu | -1.307 | 2.756 | 3.017  | 11.019 |
| Cu | -1.789 | 5.219 | 2.982  | 11.031 |
| Cu | -0.343 | 5.509 | 0.957  | 10.988 |
| Cu | 2.520  | 2.194 | 0.955  | 10.990 |
| Cu | 2.043  | 4.700 | 0.958  | 10.983 |
| Cu | 4.898  | 1.374 | 0.965  | 10.979 |
| Cu | 4.432  | 3.852 | 0.937  | 10.990 |
| Cu | 0.598  | 0.551 | 0.960  | 10.983 |
| Cu | 1.081  | 1.925 | 2.992  | 10.999 |
| Cu | 0.132  | 3.042 | 0.963  | 10.982 |

---

---
